# Supplementary material for: Associations of the Composite Dietary Antioxidant Index with Body Composition, Sarcopenia, and Sarcopenic Obesity Among US Children and Adolescents: Insights from the National Health and Nutrition Examination Survey
Source: Research Square preprint supplement (doi:10.21203/rs.3.rs-6543047/v1), 2025-06-18
Supplement: Supplementary file 2 [file 57663945de50ce9150516b31.docx]

Supplementary Table S2. MFR across BMI z-score quintiles.

|  |  |  |  | BMI-Z score |  |  | P |
| --- | --- | --- | --- | --- | --- | --- | --- |
|  | Total | Q1 | Q2 | Q3 | Q4 | Q5 |
| **male** |  |  |  |  |  |  |  |
| N | 5095 | 1018 | 1019 | 1011 | 1028 | 1019 |  |
| MFR(Mean ± SD) | 3.1 ± 1.3 | 3.6 ± 0.9 | 3.7 ± 1.2 | 3.6 ± 1.3 | 2.9 ± 1.2 | 1.9 ± 0.7 | < 0.001 |
| **female** |  |  |  |  |  |  |  |
| N | 5018 | 1003 | 1003 | 1005 | 1003 | 1004 |  |
| MFR(Mean ± SD) | 2.0 ± 0.7 | 2.7 ± 0.6 | 2.3 ± 0.5 | 2.0 ± 0.4 | 1.7 ± 0.3 | 1.3 ± 0.2 | < 0.001 |

The MFR cut-off for boys (mean-1SD of MFR for the 3rd BMI quintile) to determine sarcopenia = 2.3.

The MFR cut-off for girls (mean-1SD of MFR for the 3rd BMI quintile) to determine sarcopenia = 1.6.

MFR: Muscle to fat ratio, BMI: body mass index, SD: Standard Deviation, Q: quartile.
