# Supplementary material for: Associations of the Composite Dietary Antioxidant Index with Body Composition, Sarcopenia, and Sarcopenic Obesity Among US Children and Adolescents: Insights from the National Health and Nutrition Examination Survey
Source: Research Square preprint supplement (doi:10.21203/rs.3.rs-6543047/v1), 2025-06-18
Supplement: Supplementary file 3 [file 99c6a15ecfc6af8d0c1fc3ee.docx]

**Supplementary Table S1**. Association of weighted CDAI with sarcopenia and obesity status adjusted for physical activity (N=5612).

| Sarcopenia and Obesity Status | Crude model | |  | Adjusted model | |
| --- | --- | --- | --- | --- | --- |
| OR (95% CI) | P |  | OR (95% CI) | P |
| Normal | Ref |  |  | Ref |  |
| Obesity alone | 0.870 (0.631, 1.198) 0.392 | |  | 0.948 (0.598, 1.504) | 0.822 |
| Sarcopenia alone | 0.465 (0.362, 0.598) | <0.001 |  | 0.683 (0.476, 0.979) | 0.038 |
| Sarcopenic obesity | 0.410(0.340, 0.494) | <0.001 |  | 0.558(0.423, 0.736) | <0.001 |
| Sarcopenia | 0.436 (0.373, 0.510) | <0.001 |  | 0.603 (0.479, 0.759) | <0.001 |

Crude model: no covariate was adjusted.

Model 1 was adjusted for age, sex, race/ethnicity, poverty income ratio, education level, total energy intake, fat intake, protein intake, dietary calcium intake, white blood cell count, **physical activity,** andcycle year.

CDAI: composite dietary antioxidant index, CI: confidence interval, OR: odds ratio, Ref: References.
