# Supplementary figures and images for: Associations of the Composite Dietary Antioxidant Index with Body Composition, Sarcopenia, and Sarcopenic Obesity Among US Children and Adolescents: Insights from the National Health and Nutrition Examination Survey
Source: Research Square preprint supplement (doi:10.21203/rs.3.rs-6543047/v1), 2025-06-18

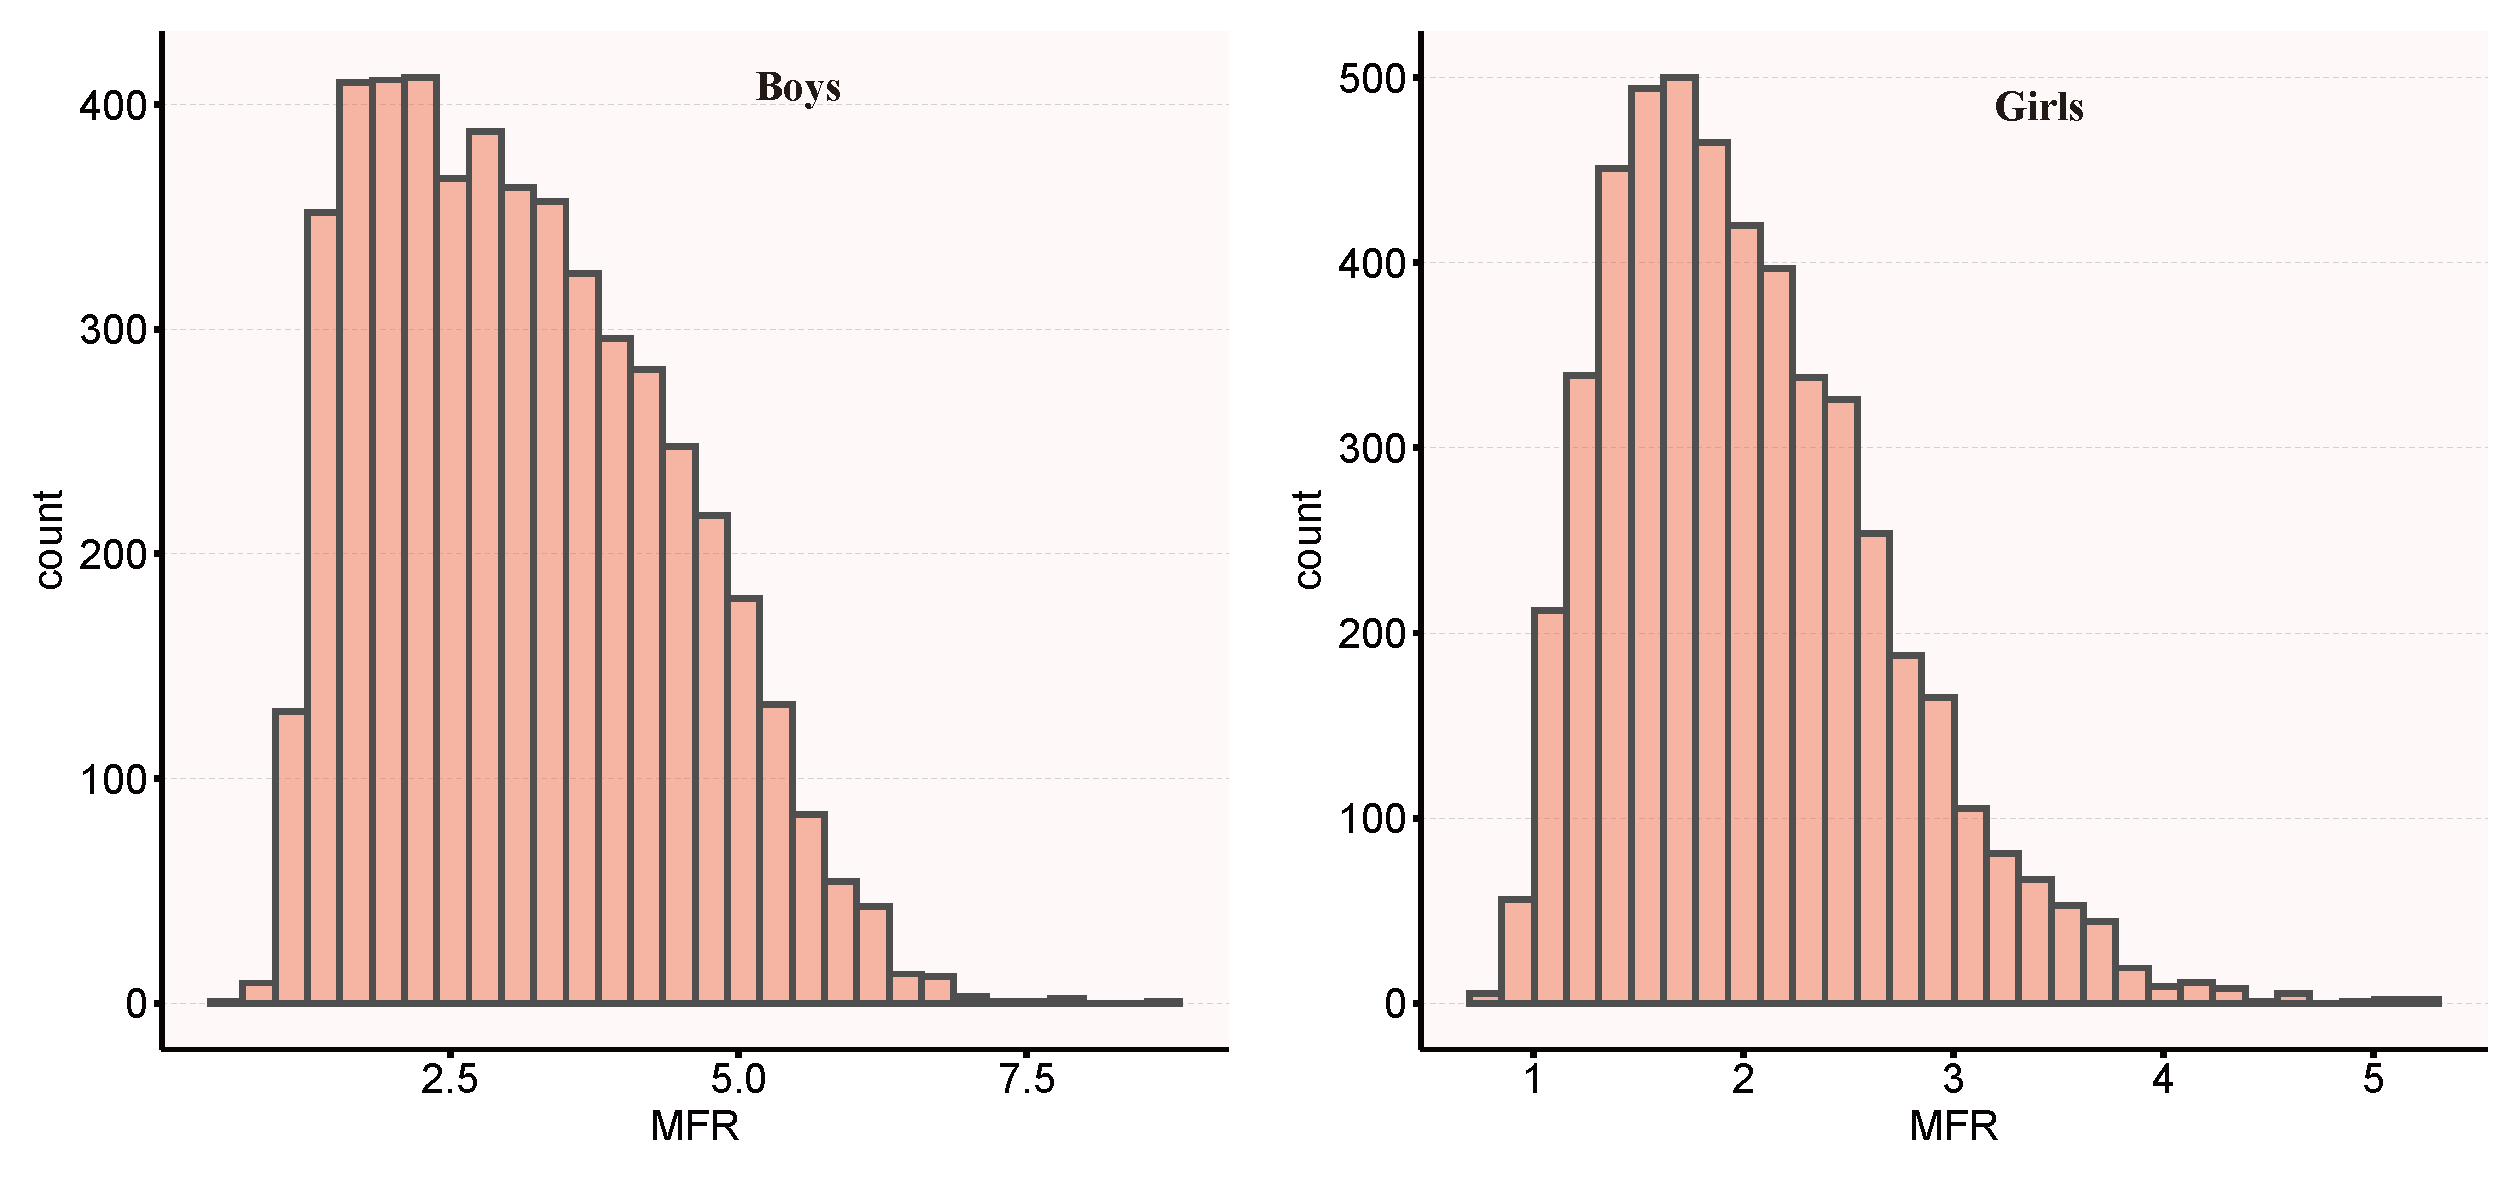


**Supplementary Figure. S1.** Histogram of muscle to fat ratio (MFR) stratified by gender.

Supplement: Supplementary file 1 [file 45eca62e822054853c25e572.docx]
